# Supplementary material
Source: PubMed Central journal article supplement (PMC4486471)
Supplement: NIHMS4442-supplement-supple.pdf [file NIHMS4442-supplement-supple.pdf]

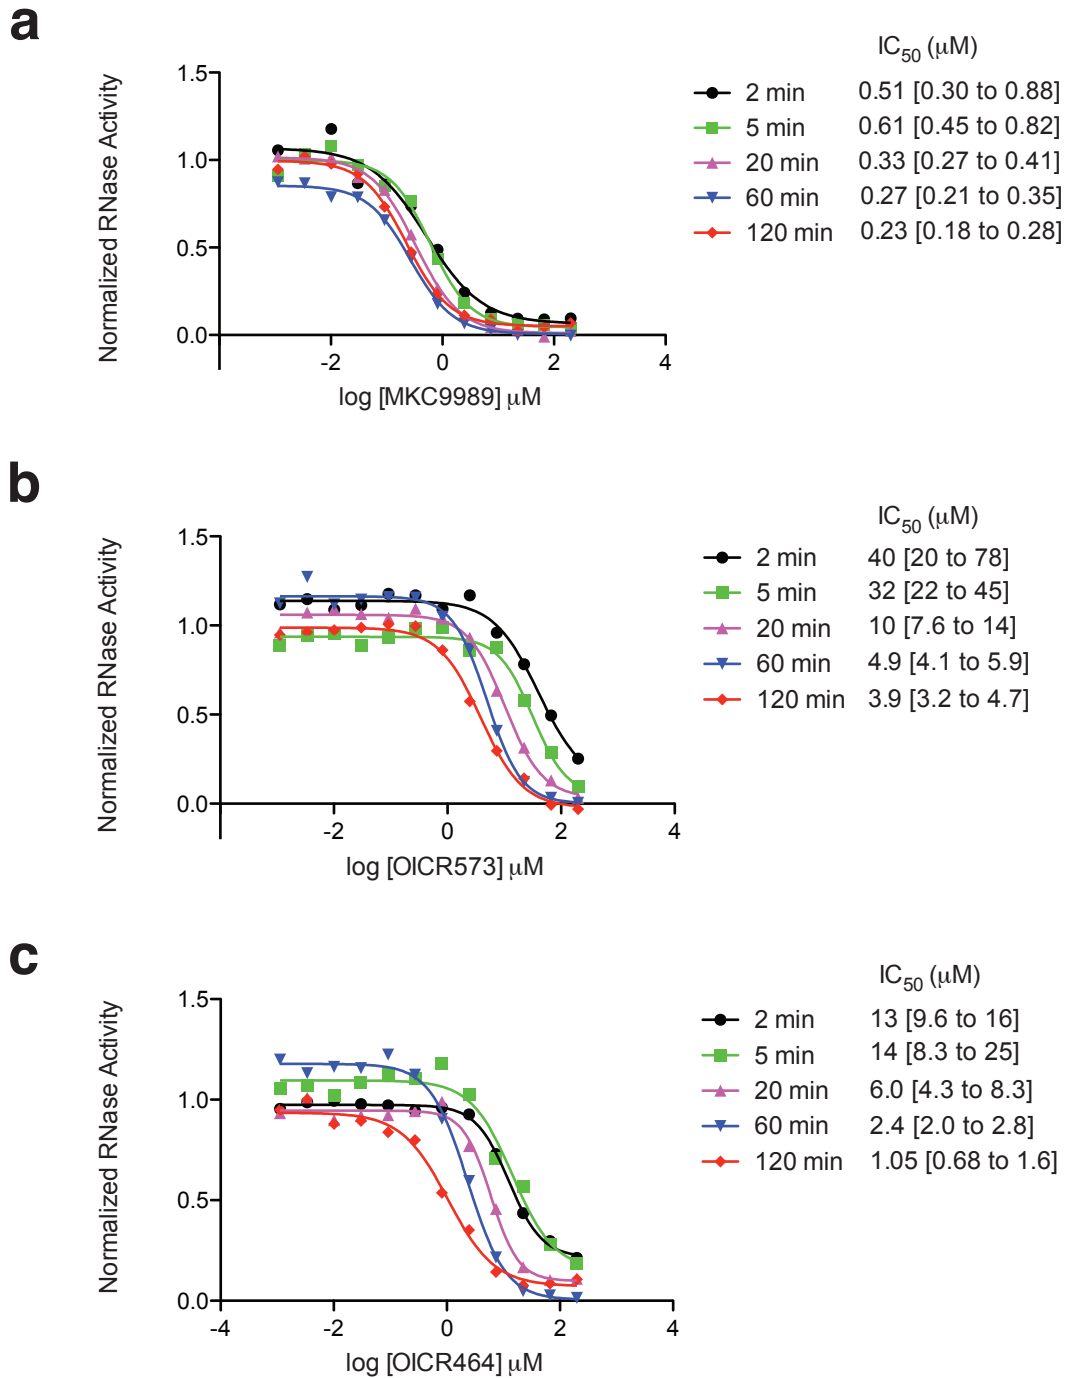

**Supplementary Figure 1.** Time dependency of inhibition of murine IRE1 $\alpha$  RNase activity by MKC9989 (a), OICR573 (b), and OICR464 (c), using a real time fluorescence readout assay. IC<sub>50</sub>s and 95% confidence intervals (in brackets) are derived from a single fitted profile through measurements from two experiments.

**S2**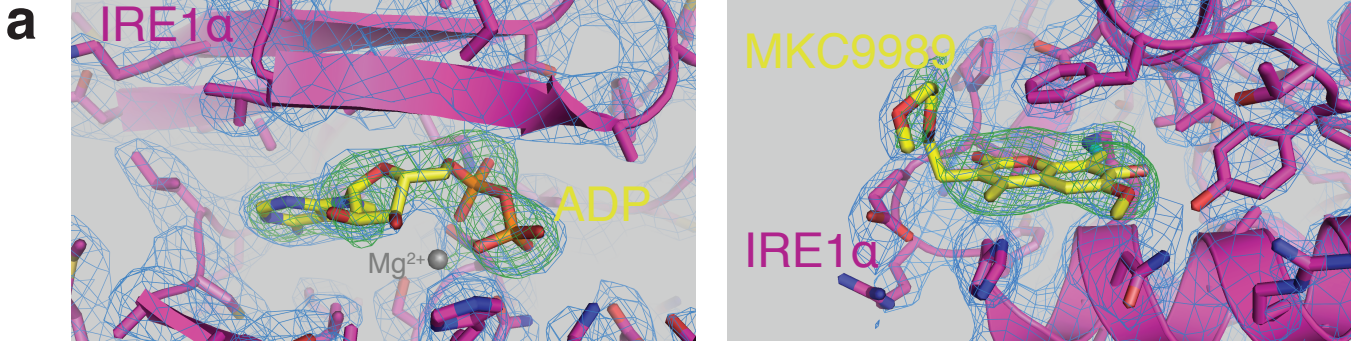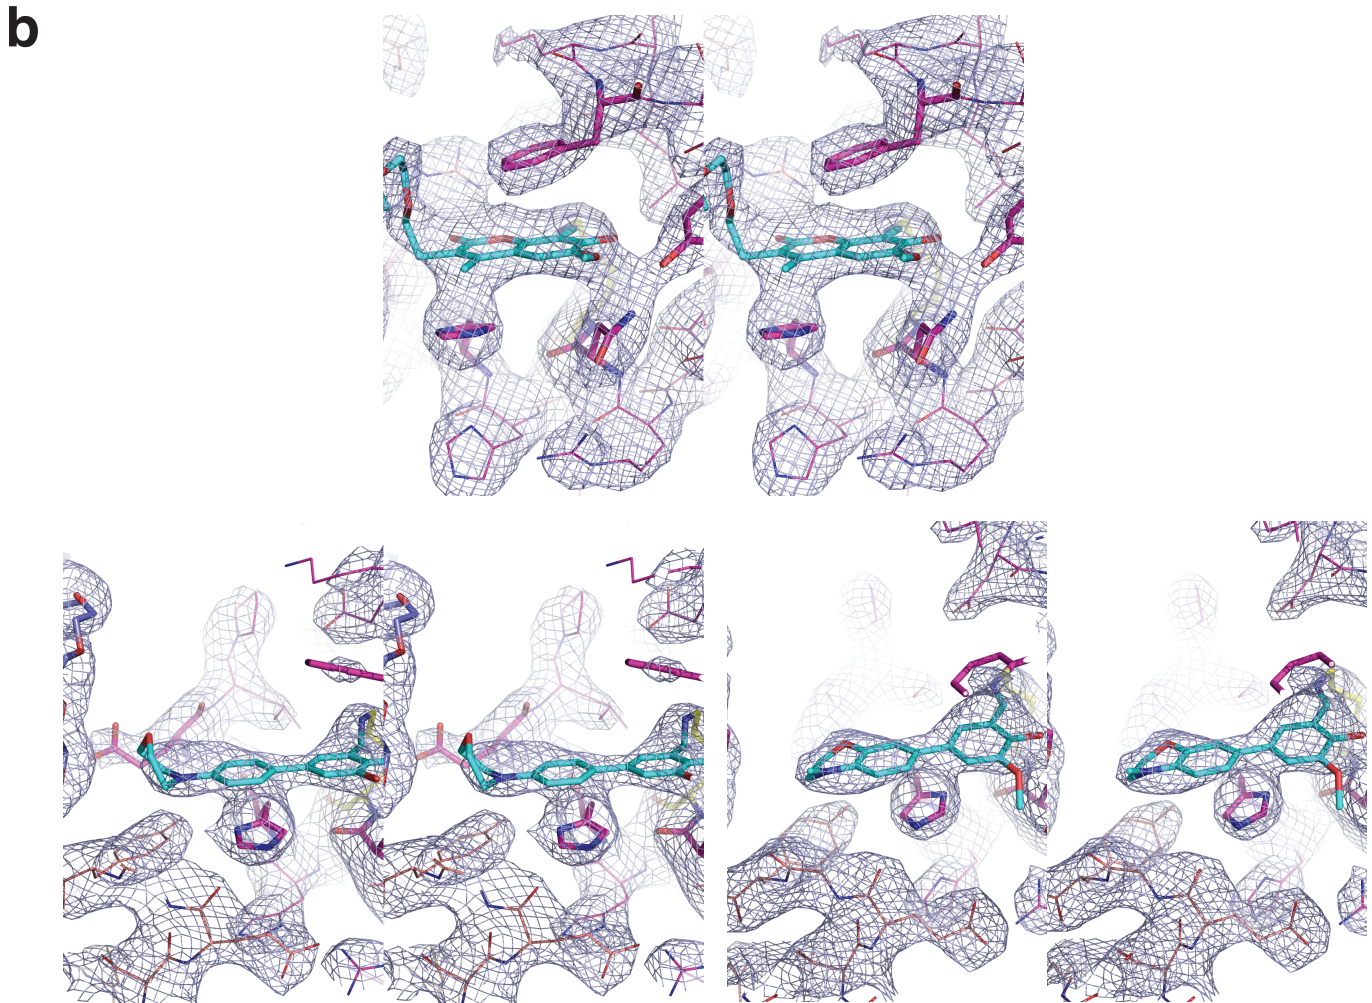

**Supplementary Figure 2.** (a) Representative electron density maps of ADP engaging the kinase active site (left) and MKC9989 engaging the RNase active site (right) of IRE1 $\alpha$  in the IRE1 $\alpha$  - MKC9989 co-structure. 2Fo-Fc electron density corresponding to the final refined map contoured at 1.3 $\sigma$  (blue wire mesh). Simulated annealing omit map contoured at 3.0 $\sigma$  for the omitted ligand (green wire mesh). Protein is coloured purple and ligands are coloured with carbon atoms yellow. (b) Stereo views of representative 2Fo-Fc electron density maps contoured at 1.5 $\sigma$  (blue wire mesh) centered on the MKC9989 (top), OICR573 (bottom left) and OICR464 (bottom right) binding sites. Protein is coloured purple and ligands are coloured with carbon atoms in blue.



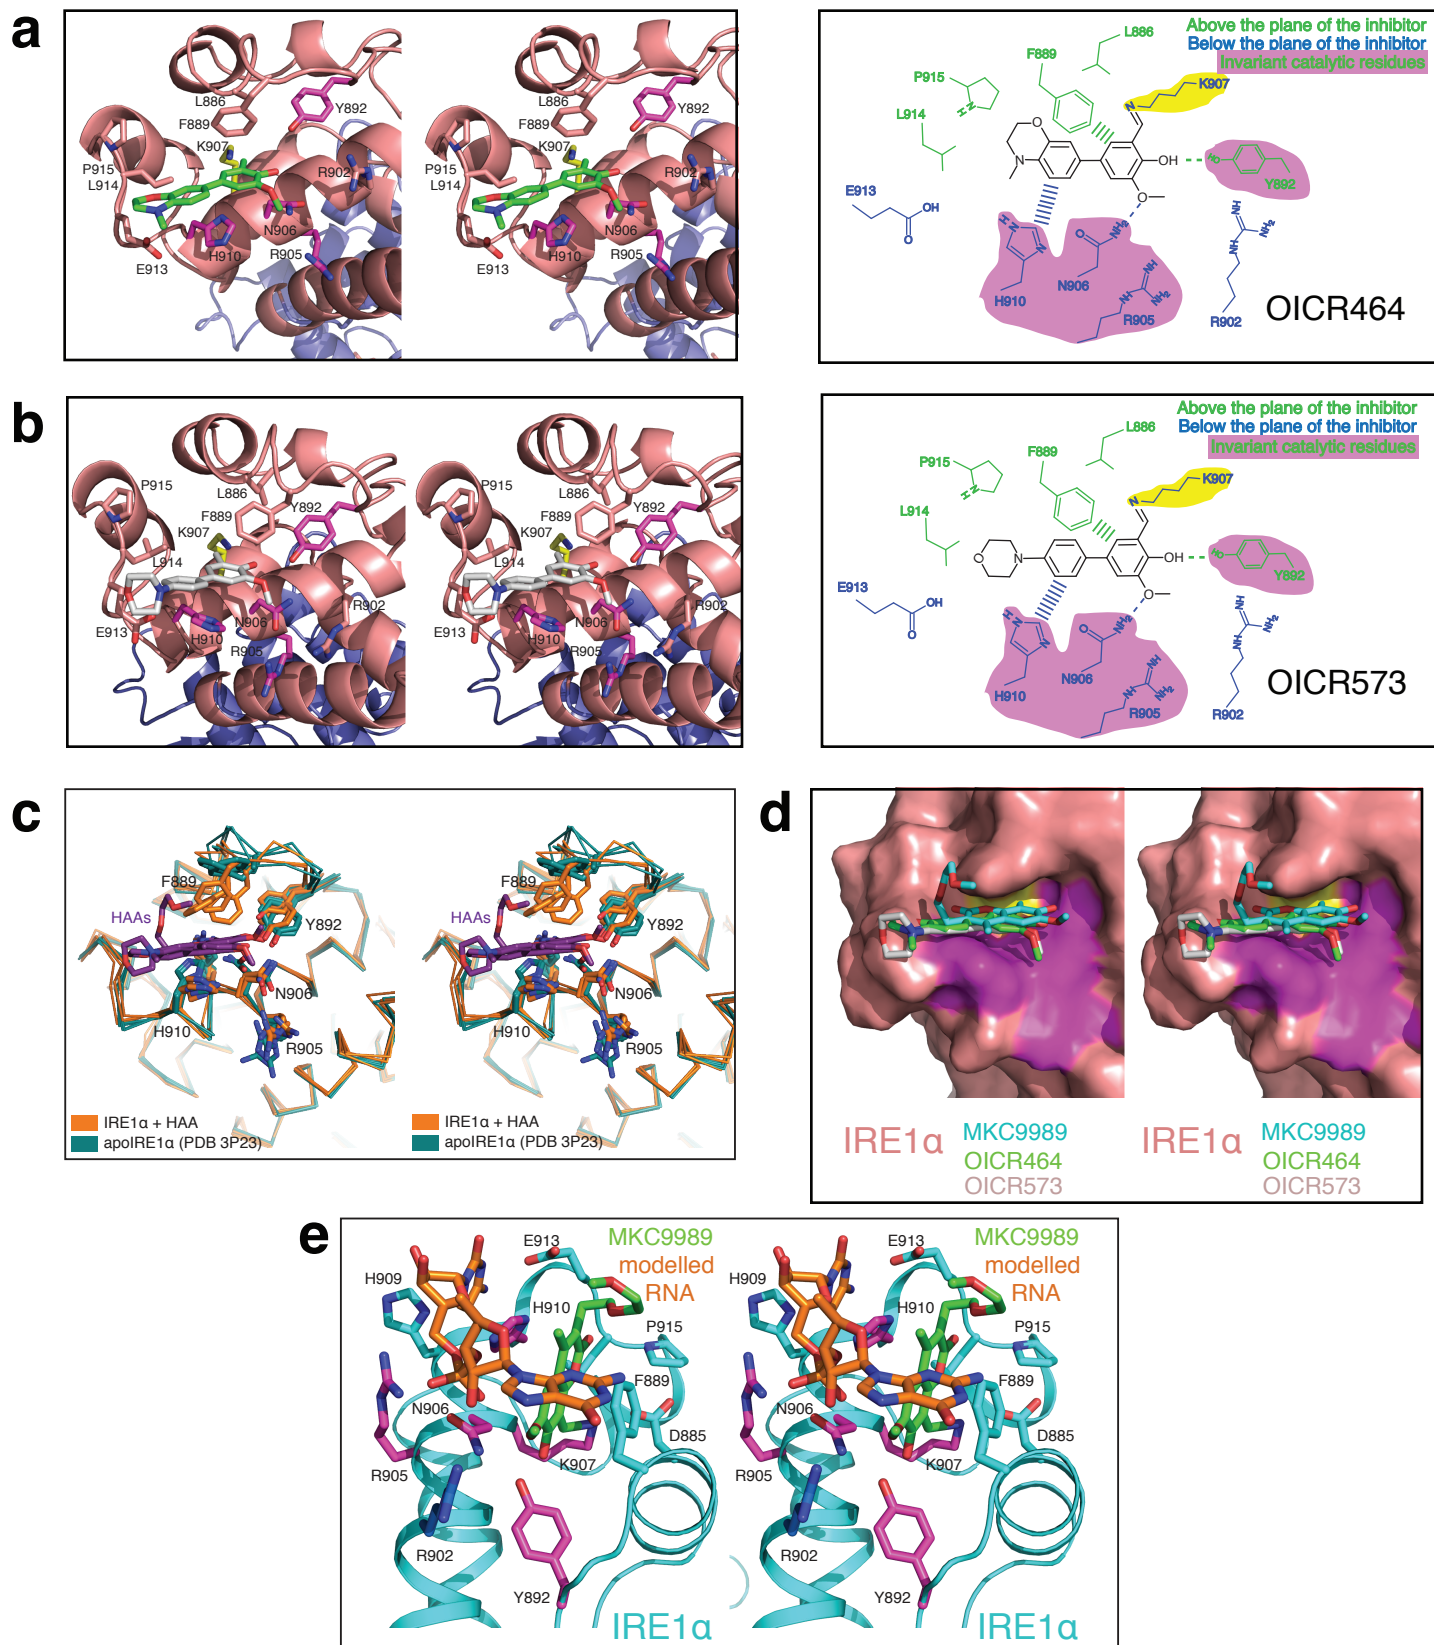

**Supplementary Figure 3.** Structure of IRE1 $\alpha$  bound to OICR464 and OICR573. **(a)** Stereo (left) and schematic (right) representations of OICR464 binding to IRE1 $\alpha$ . Colouring as in Figure 3B but with HAA shown in green. **(b)** Stereo (left) and schematic (right) representations of OICR573 binding to IRE1 $\alpha$ . **(c)** Stereo view of overlaid binding modes of MKC9989, OICR464 and OICR573 to IRE1 $\alpha$  with HAA shown in purple. **(d)** Stereo surface view of overlaid binding modes of MKC9989, OICR464 and OICR573 to IRE1 $\alpha$ . **(e)** Structure of IRE1 $\alpha$  (blue) bound to MKC9989 (green) and a modeled dinucleotide RNA substrate (orange).

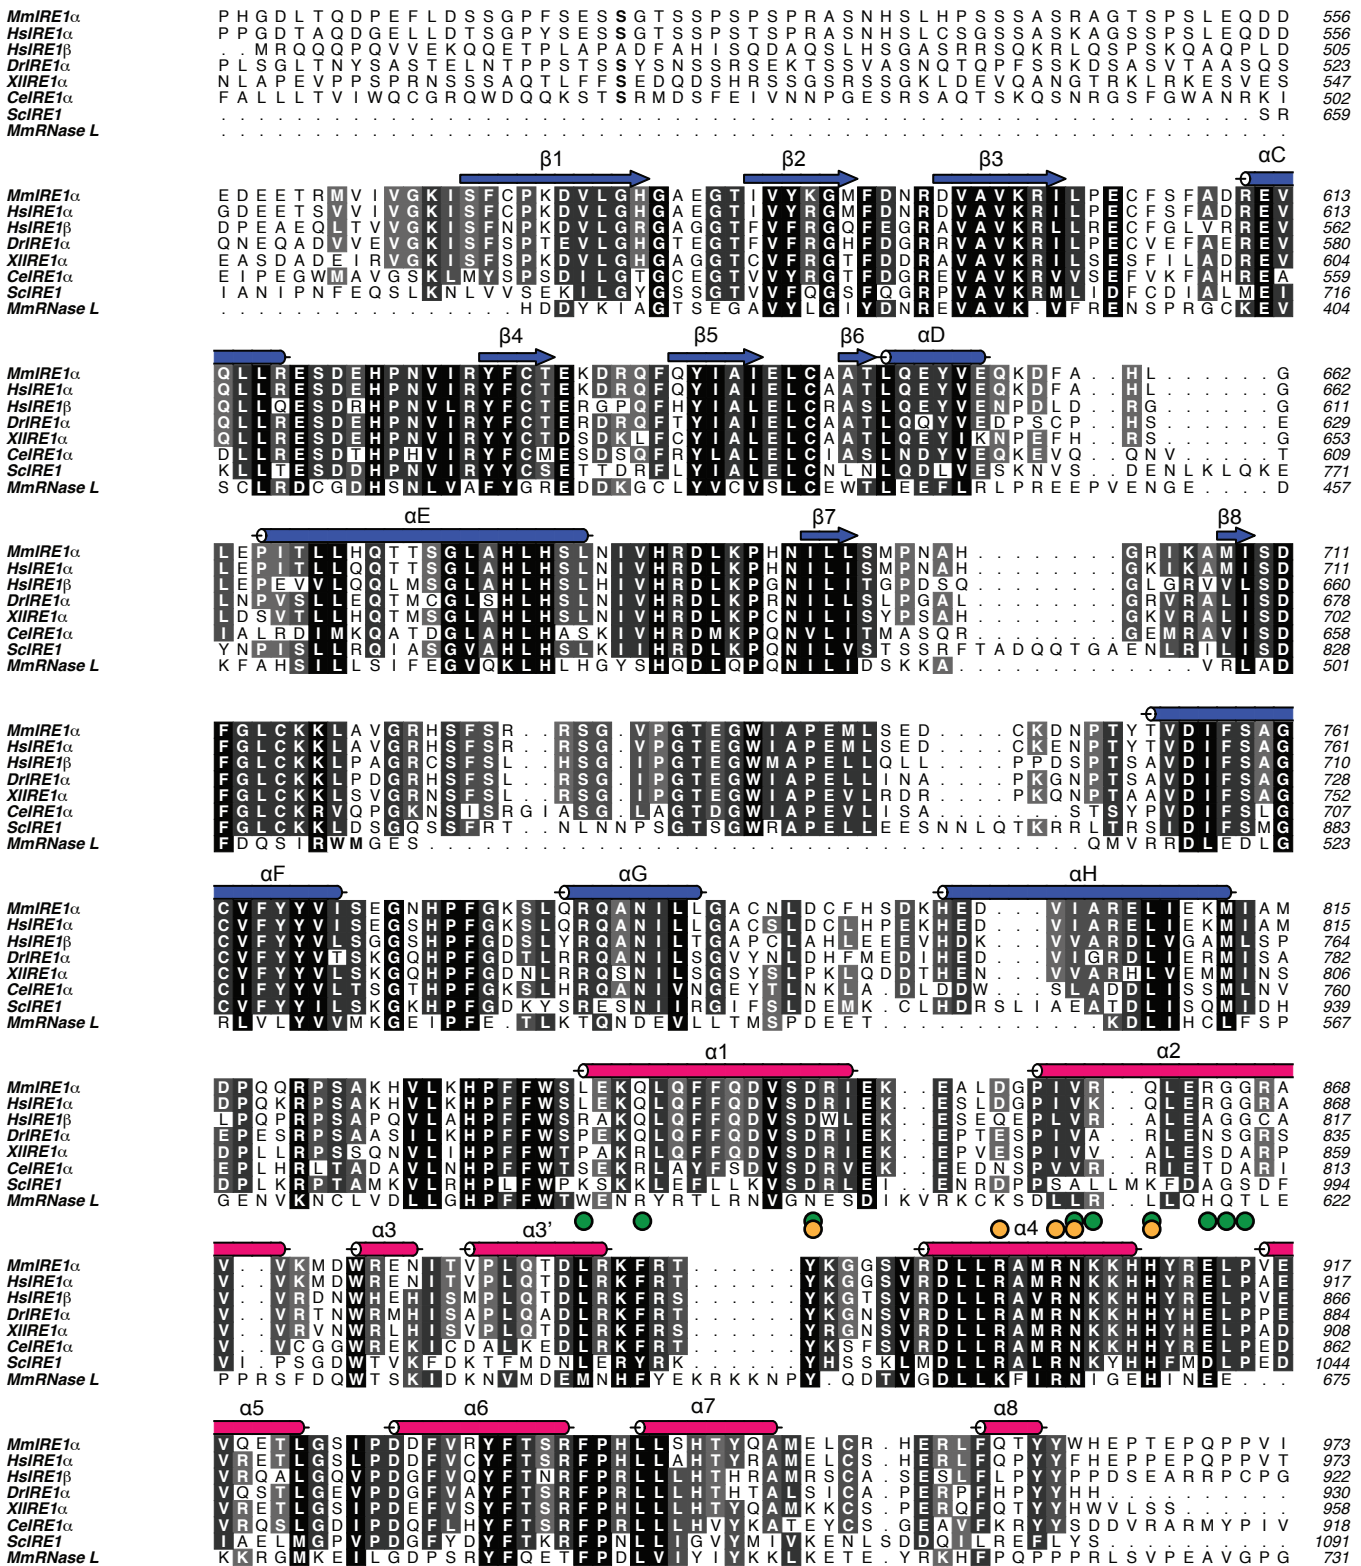

● Conserved catalytic residues      ● HAA binding pocket residues

**Supplementary Figure 4.** Sequence alignment of the cytosolic portion of IRE1 orthologues. The species in the alignment are (top to bottom): *Mus musculus*, *Homo sapiens*, *Danio rerio*, *Xenopus laevis*, *Caenorhabditis elegans*, and *Saccharomyces cerevisiae*. Shown at bottom of the alignment is the sequence of the paralogue *Homo sapiens* RNase L. The secondary structure of murine IRE1 $\alpha$  is highlighted over the sequence.

a

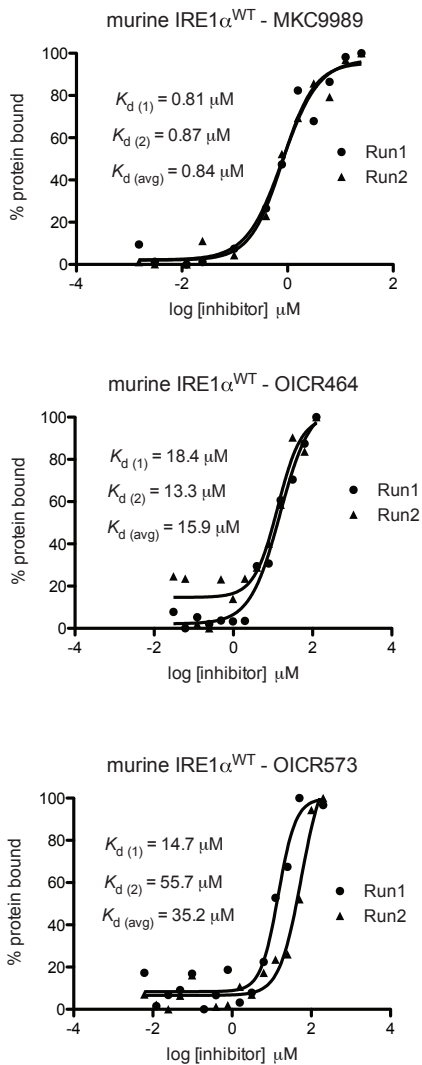

b

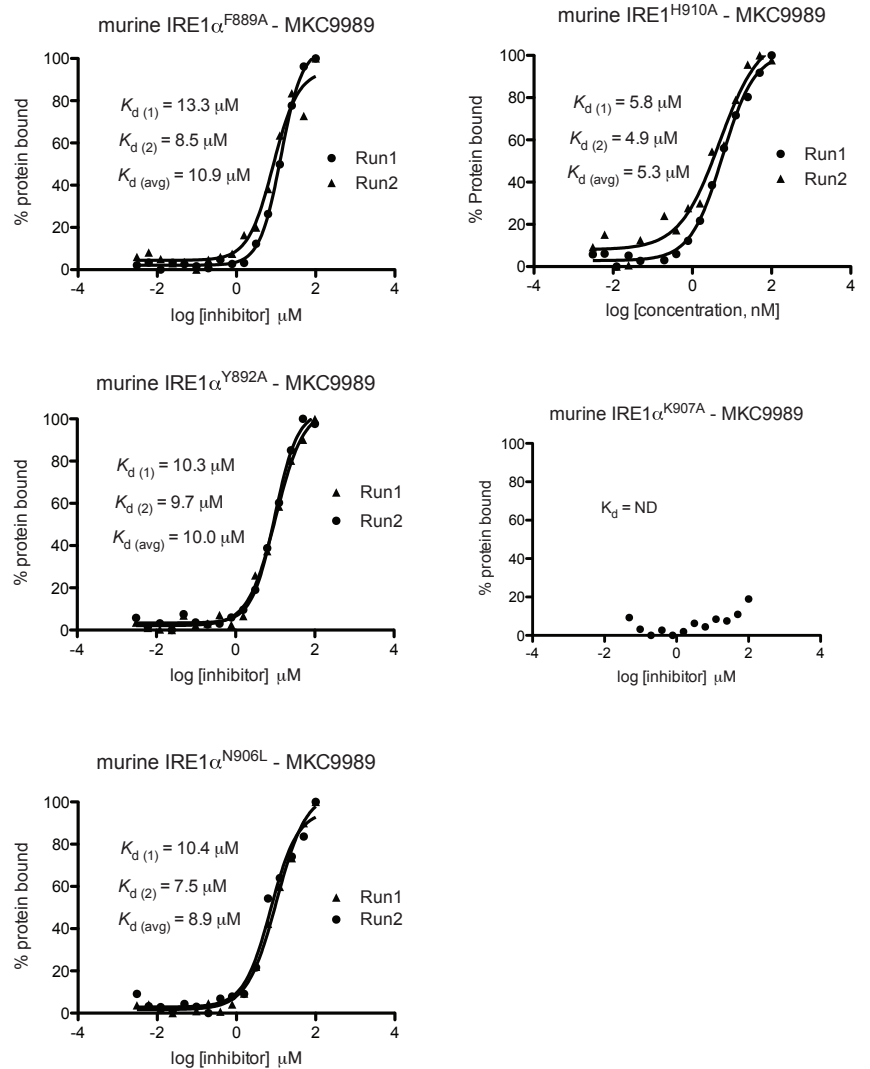

**Supplementary Figure 5.** Measurement of direct binding of HAA inhibitors to murine IRE1 $\alpha$  by micro-scale thermophoresis. **(a)** Binding of murine IRE1 $\alpha^{WT}$  to MKC9989, OICR464 and OICR573. **(b)** Binding of MKC9989 to murine IRE1 $\alpha$  mutants Phe889Ala, Tyr892Ala, Asn906Leu, His910Ala and Lys907Ala. Shown are the fitted profiles of the two duplicates with the  $K_d$  for each as well as the  $K_d$  (average)



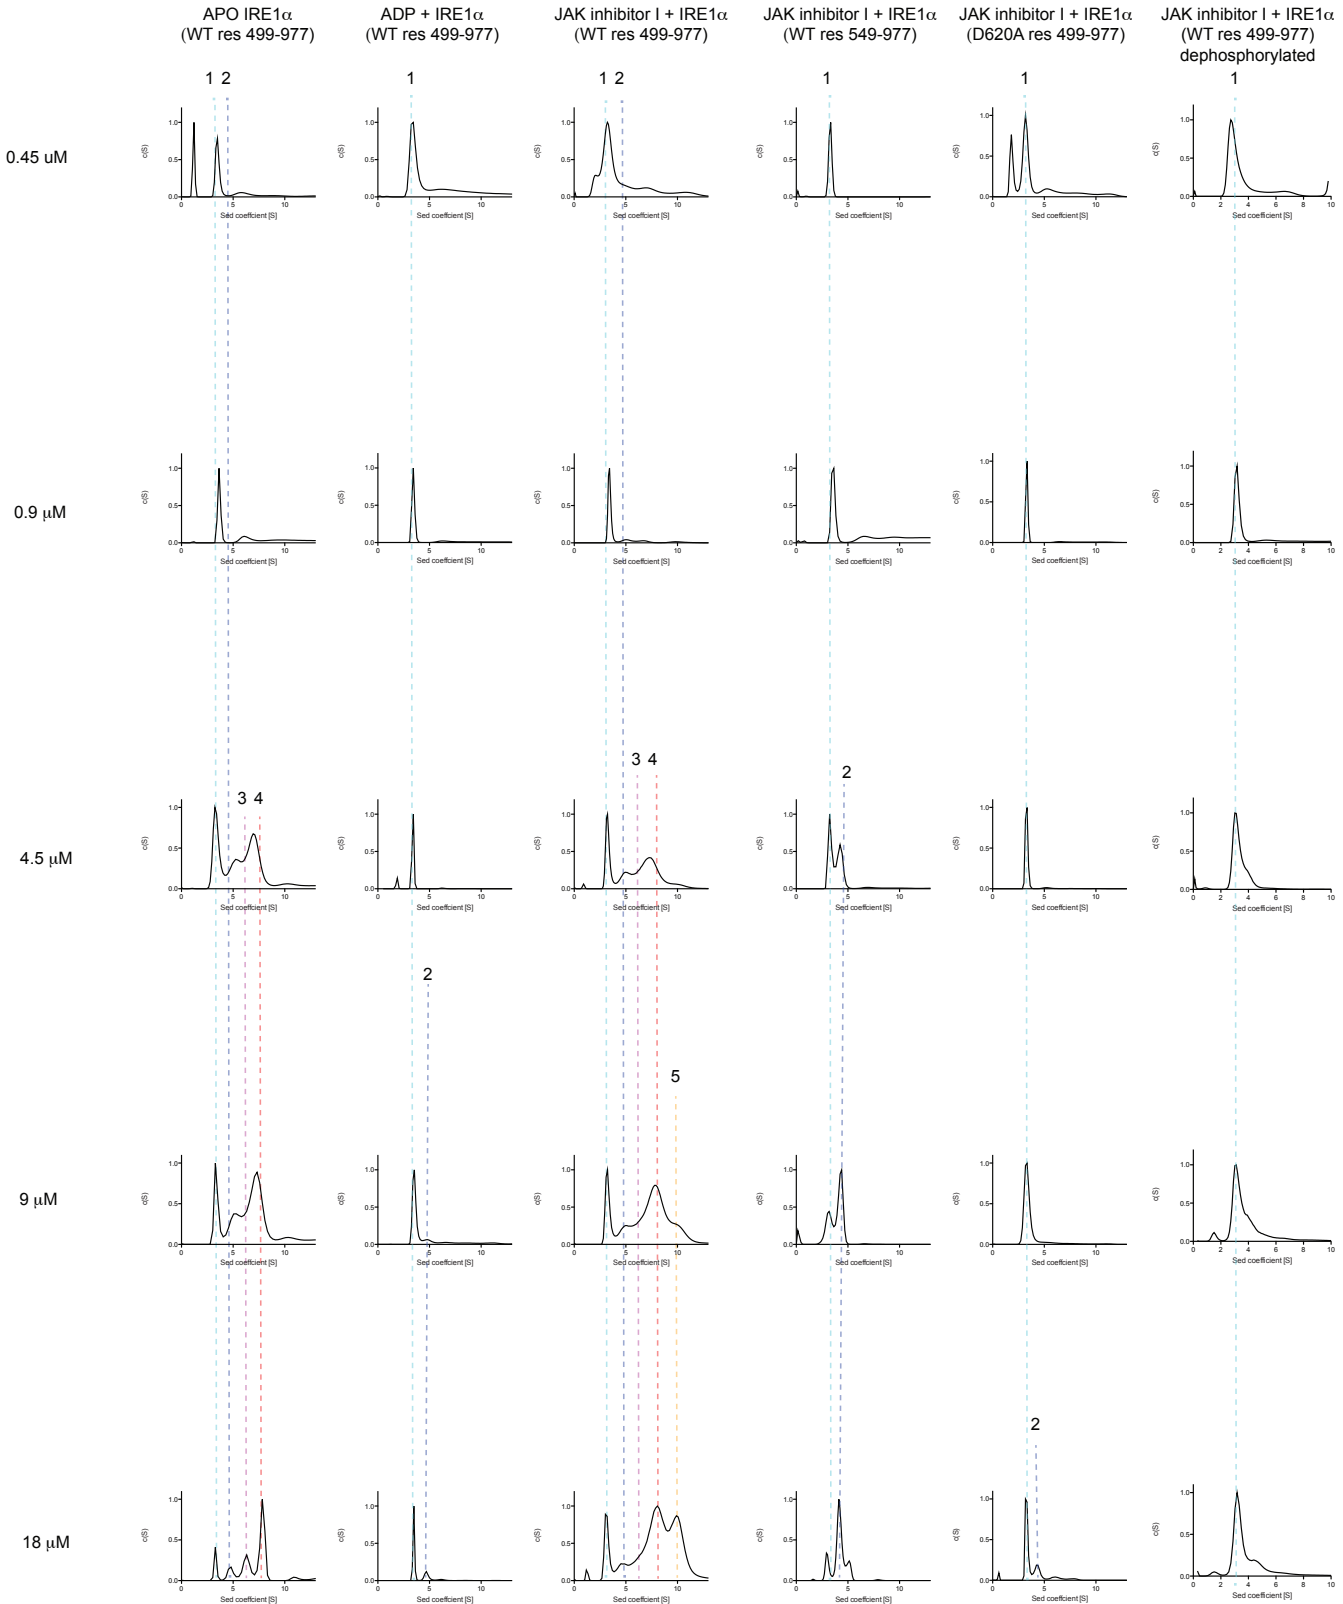

**Supplementary Figure 6.** Analysis of the oligomerization status of murine IRE1 $\alpha$ . Analytical ultracentrifugation analyses were performed on murine IRE1 $\alpha$  preparations (labelled at top) at the indicated protein concentrations (labeled at left). Concentrations of ADP and JAK inhibitor I were 500  $\mu$ M and 30  $\mu$ M respectively.
